# Supplementary material
Source: publisher figshare collection journal article supplement (https://sage.figshare.com/ndownloader/files/17709854)
Supplement: Supplementary file 1 [file 17709854]

## **Appendix 1 Electronic search strategy**

Search Name: Cochrane

Last Saved: 08/01/2017 10:01:19.724

- #1 MeSH descriptor: [Back Pain] explode all trees
- #2 dorsalgia
- #3 backache
- #4 MeSH descriptor: [Low Back Pain] explode all trees
- #5 lumbar next pain or coccyx or coccydynia or sciatica or spondylosis
- #6 MeSH descriptor: [Spine] explode all trees
- #7 MeSH descriptor: [Spinal Diseases] explode all trees
- #8 lumbago or discitis or disc near degeneration or disc near prolapse or disc near herniation
- #9 spinal fusion
- #10 spinal neoplasms
- #11 facet near joints
- #12 MeSH descriptor: [Intervertebral Disc] explode all trees
- #13 postlaminectomy
- #14 arachnoiditis
- #15 failed near back
- #16 MeSH descriptor: [Cauda Equina] explode all trees
- #17 lumbar near vertebra\*
- #18 spinal near stenosis
- #19 slipped near (disc\* or disk\*)
- #20 degenerat\* near (disc\* or disk\*)
- #21 stenosis near (spine or root or spinal)
- #22 displace\* near (disc\* or disk\*)
- #23 prolap\* near (disc\* or disk\*)
- #24 MeSH descriptor: [Sciatic Neuropathy] explode all trees
- #25 sciatic\*
- #26 back disorder\*
- #27 back near pain
- #28 #1 or #2 or #3 or #4 or #5 or #6 or #7 or #8 or #9 or #10 or #11 or #12 or #13 or #14 or #15 or #16  
or #17 or #18 or #19 or #20 or #21 or #22 or #23 or #24 or #25 or #26 or #27
- #29 MeSH descriptor: [Acupuncture] explode all trees

- #30 MeSH descriptor: [Acupuncture Therapy] explode all trees
- #31 MeSH descriptor: [Acupuncture Points] explode all trees
- #32 MeSH descriptor: [Acupuncture, Ear] explode all trees
- #33 MeSH descriptor: [Electroacupuncture] explode all trees
- #34 MeSH descriptor: [Electric Stimulation Therapy] explode all trees
- #35 MeSH descriptor: [Acupressure] explode all trees
- #36 acupuncture\* or electroacupuncture\*
- #37 acupressure\*
- #38 #28 and #37
